# Supplementary material for: Effects of temperature on the timing of breeding and molt transitions in house finches
Source: Oxford University Press journal article supplement (doi:10.1242/jeb.185058), 2018-01-01

Fig. S1. Body mass of male house finches in control (open circles) and warm (filled circles) treatment groups around termination of reproduction (May-July). Temperature manipulation began on day 0.

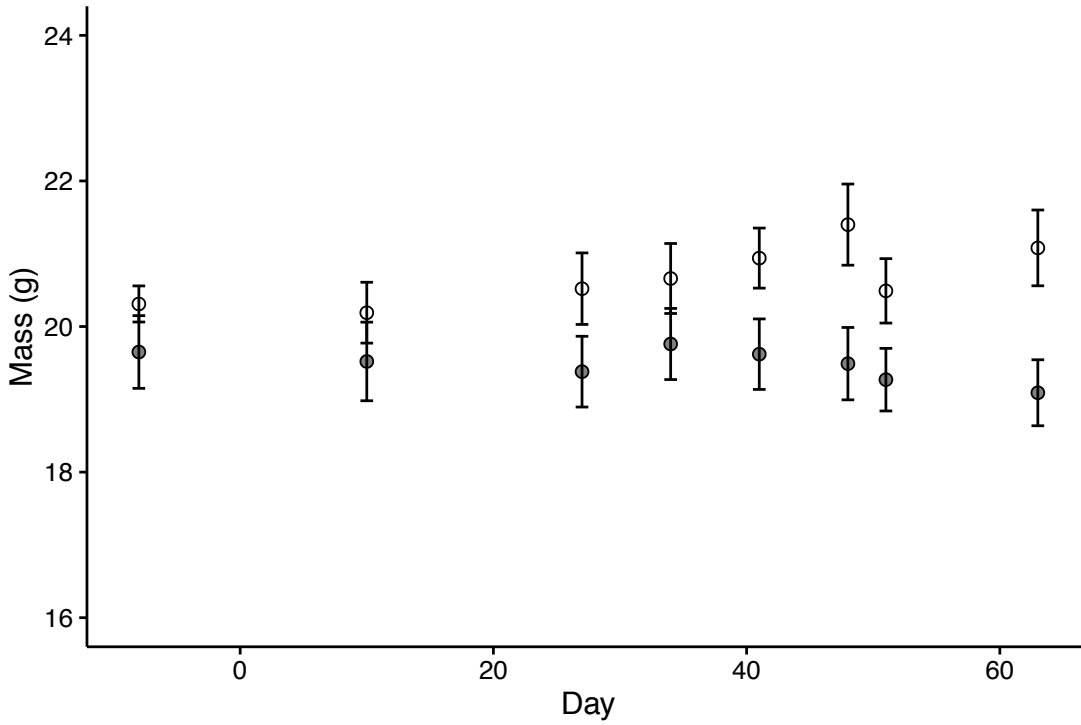

Supplement: jeb185058supp.pdf [file jeb185058supp.pdf]
